# Supplementary material
Source: publisher site journal article supplement (https://www.dovepress.com/article/246294)
Supplement: Supplementary file 1 [file get_supplementary_file.php]

**Supplementary Table 1** Univariate logistic regression analyses of demographic and clinical features for patients with BD and comorbid anxiety disorders versus non-comorbid anxiety disorders

| Features                                                         | Comorbid anxiety group (N=58*) | Non-comorbid anxiety group (N=51*) | Odds ratio (95% CI) | P-value |
|------------------------------------------------------------------|--------------------------------|------------------------------------|---------------------|---------|
| Sex (male), N (%)                                                | 23 (39.7)                      | 22 (43.1)                          | 0.87 (0.40–1.86)    | .713    |
| History of marriage, N (%)                                       | 27 (47.4)                      | 33 (64.7)                          | 0.49 (0.23–1.07)    | .072    |
| History of divorce, N (%)                                        | 12 (20.7)                      | 12 (23.5)                          | 0.85 (0.34–2.10)    | .721    |
| History of spouse's death, N (%)                                 | 3 (5.2)                        | 1 (2.0)                            | 2.73 (0.27–27.08)   | .392    |
| Presence of spouse, N (%)                                        | 15 (25.9)                      | 25 (49.0)                          | 0.36 (0.16–0.81)    | .013    |
| Presence of child, N (%)                                         | 17 (29.3)                      | 26 (51.0)                          | 0.40 (0.18–0.88)    | .022    |
| Presence of housemate, N (%)                                     | 41 (70.7)                      | 43 (84.3)                          | 0.45 (0.17–1.15)    | .096    |
| Currently employed, N (%)                                        | 22 (37.9)                      | 25 (49.0)                          | 0.64 (0.30–1.36)    | .245    |
| History of job turnover, N (%)                                   | 40 (69.0)                      | 30 (60.0)                          | 1.48 (0.67–3.28)    | .332    |
| History of smoking, N (%)                                        | 26 (44.8)                      | 19 (37.3)                          | 1.37 (0.63–2.95)    | .424    |
| Family history of BD in first-degree relatives, N (%)            | 16 (28.1)                      | 10 (19.6)                          | 1.60 (0.65–3.94)    | .307    |
| Family history of MDD in first-degree relatives, N (%)           | 5 (8.6)                        | 3 (5.9)                            | 1.51 (0.34–6.66)    | .587    |
| Family history of schizophrenia in first-degree relatives, N (%) | 0 (0.0)                        | 0 (0.0)                            | –                   | –       |
| Family history of suicide in first-degree relatives, N (%)       | 3 (5.2)                        | 0 (0.0)                            | n.c.                | .984    |
| Family history of alcohol abuse in first-degree relatives, N (%) | 4 (6.9)                        | 5 (9.8)                            | 0.68 (0.17–2.69)    | .584    |
| Early age at onset of MDE (<25 years), N (%)                     | 26 (44.8)                      | 19 (37.3)                          | 1.37 (0.63–2.95)    | .424    |
| Early age at onset of mood episode (<25 years), N (%)            | 35 (60.3)                      | 23 (45.1)                          | 1.85 (0.86–3.97)    | .113    |
| History of psychotic symptoms, N (%)                             | 7 (12.1)                       | 5 (9.8)                            | 1.26 (0.37–4.26)    | .707    |
| Early age at onset of psychotic symptoms (<30 years), N (%)      | 4 (57.1)                       | 1 (25.0)                           | 4.00 (0.27–60.32)   | .317    |
| History of suicide attempt, N (%)                                | 27 (46.6)                      | 17 (33.3)                          | 1.74 (0.80–3.79)    | .162    |
| History of psychiatric hospitalization, N (%)                    | 9 (15.5)                       | 8 (15.7)                           | 0.99 (0.35–2.78)    | .981    |
| Seasonal mood episodes, N (%)                                    | 9 (15.5)                       | 6 (11.8)                           | 1.38 (0.45–4.18)    | .571    |
| Two or more previous mood episodes, N (%)                        | 38 (69.1)                      | 37 (75.5)                          | 0.72 (0.30–1.72)    | .467    |
| Five or more previous mood episodes, N (%)                       | 18 (32.7)                      | 14 (28.6)                          | 1.22 (0.53–2.81)    | .647    |
| Two or more previous mood episodes within the past year, N (%)   | 9 (16.1)                       | 10 (20.4)                          | 0.75 (0.28–2.02)    | .565    |
| Five or more previous mood episodes within the past year, N (%)  | 2 (3.6)                        | 2 (4.1)                            | 0.87 (0.12–6.42)    | .891    |

|                                                             |                   |                   |                  |      |
|-------------------------------------------------------------|-------------------|-------------------|------------------|------|
| Mood stabilizer therapy in present use, N (%)               | 39 (67.2)         | 33 (64.7)         | 1.12 (0.51–2.48) | .780 |
| Antidepressant therapy in present use, N (%)                | 38 (65.5)         | 33 (64.7)         | 1.04 (0.47–2.28) | .929 |
| Antipsychotics therapy in present use, N (%)                | 22 (37.9)         | 20 (39.2)         | 0.95 (0.44–2.05) | .891 |
| Anxiolytic therapy in present use, N (%)                    | 37 (63.8)         | 23 (45.1)         | 2.14 (0.99–4.63) | .052 |
| Mood lability with antidepressants, N (%)                   | 23 (41.8)         | 13 (29.5)         | 1.71 (0.74–3.97) | .209 |
| Antidepressant-related switch to mania/hypomania, N (%)     | 17 (30.9)         | 13 (28.9)         | 1.10 (0.47–2.61) | .827 |
| Mood reactivity, N (%)                                      | 27 (46.6)         | 28 (54.9)         | 0.72 (0.34–1.52) | .385 |
| Significant weight gain or increase in appetite, N (%)      | 18 (31.0)         | 9 (17.6)          | 2.10 (0.85–5.22) | .110 |
| Hypersomnia, N (%)                                          | 13 (22.4)         | 12 (23.5)         | 0.94 (0.38–2.30) | .890 |
| Lead paralysis, N (%)                                       | 12 (20.7)         | 9 (17.6)          | 1.22 (0.47–3.18) | .688 |
| Interpersonal rejection sensitivity, N (%)                  | 37 (63.8)         | 18 (35.3)         | 3.23 (1.47–7.08) | .003 |
| Atypical depression, N (%)                                  | 11 (19.0)         | 6 (11.8)          | 1.76 (0.60–5.15) | .305 |
| Pathological guilt feelings, N (%)                          | 34 (58.6)         | 17 (33.3)         | 2.83 (1.30–6.19) | .009 |
| Duration of MDE period ( $\leq 1$ month), N (%)             | 14 (25.0)         | 10 (20.8)         | 1.27 (0.50–3.19) | .616 |
| Duration of MDE period ( $< 6$ months), N (%)               | 31 (55.4)         | 29 (60.4)         | 0.81 (0.37–1.78) | .603 |
| Current psychotic symptoms, N (%)                           | 4 (6.9)           | 0 (0.0)           | n.c.             | .981 |
| History of parent's bereavement, N (%)                      | 9 (16.4)          | 8 (16.3)          | 1.00 (0.35–2.84) | .996 |
| History of nurture except parents, N (%)                    | 4 (7.1)           | 5 (10.2)          | 0.68 (0.17–2.68) | .578 |
| Comorbid substance-related disorder, N (%)                  | 7 (12.3)          | 4 (8.0)           | 1.61 (0.44–5.86) | .470 |
| Comorbid personality disorder, N (%)                        | 2 (3.6)           | 0 (0.0)           | n.c.             | .980 |
| Mixed features of MDE, N (%)                                | 17 (29.3)         | 14 (27.5)         | 1.10 (0.48–2.53) | .830 |
| Age (years), mean $\pm$ SD                                  | 36.2 $\pm$ 9.0    | 39.5 $\pm$ 11.5   | 0.97 (0.93–1.01) | .092 |
| Duration of education (years), mean $\pm$ SD                | 13.5 $\pm$ 2.7    | 14.0 $\pm$ 2.2    | 0.93 (0.79–1.08) | .330 |
| Amount of alcohol intake (g/week), mean $\pm$ SD            | 139.4 $\pm$ 153.9 | 101.8 $\pm$ 126.3 | 1.00 (1.00–1.01) | .379 |
| Age at onset of (hypo) manic episode (years), mean $\pm$ SD | 25.9 $\pm$ 10.8   | 29.1 $\pm$ 11.3   | 0.97 (0.94–1.01) | .157 |
| Age at onset of MDE (years), mean $\pm$ SD                  | 27.8 $\pm$ 9.8    | 30.2 $\pm$ 10.8   | 0.98 (0.94–1.01) | .216 |
| Age at onset of mood episode (years), mean $\pm$ SD         | 24.9 $\pm$ 10.3   | 28.1 $\pm$ 11.0   | 0.97 (0.94–1.01) | .124 |
| Age at onset of psychotic symptoms (years), mean $\pm$ SD   | 27.1 $\pm$ 6.8    | 34.8 $\pm$ 12.6   | 0.90 (0.77–1.06) | .206 |
| Previous mood episodes, mean $\pm$ SD                       | 8.9 $\pm$ 32.4    | 5.2 $\pm$ 6.9     | 1.01 (0.98–1.03) | .500 |
| Previous mood episodes within the past year, mean $\pm$ SD  | 0.9 $\pm$ 1.8     | 1.0 $\pm$ 1.4     | 0.96 (0.76–1.23) | .762 |
| Duration of MDE period (month), mean $\pm$ SD               | 12.7 $\pm$ 19.6   | 7.3 $\pm$ 9.0     | 1.03 (1.00–1.06) | .099 |
| GAF score, mean $\pm$ SD                                    | 54.3 $\pm$ 10.4   | 54.8 $\pm$ 11.7   | 1.00 (0.96–1.03) | .838 |
| SF-36, Physical functioning, mean $\pm$ SD                  | 68.1 $\pm$ 18.3   | 73.2 $\pm$ 23.6   | 0.99 (0.97–1.01) | .204 |
| SF-36, Role physical, mean $\pm$ SD                         | 40.0 $\pm$ 27.6   | 44.4 $\pm$ 30.8   | 0.99 (0.98–1.01) | .440 |
| SF-36, Bodily pain, mean $\pm$ SD                           | 52.1 $\pm$ 26.8   | 55.9 $\pm$ 27.3   | 0.99 (0.98–1.01) | .464 |

|                                              |             |             |                   |      |
|----------------------------------------------|-------------|-------------|-------------------|------|
| SF-36, General health perception, mean ± SD  | 29.5 ± 14.7 | 34.7 ± 18.4 | 0.98 (0.96–1.00)  | .108 |
| SF-36, Vitality, mean ± SD                   | 17.3 ± 14.3 | 22.3 ± 17.3 | 0.98 (0.96–1.00)  | .100 |
| SF-36, Social functioning, mean ± SD         | 37.3 ± 26.6 | 49.8 ± 25.7 | 0.98 (0.97–1.00)  | .017 |
| SF-36, Role emotional, mean ± SD             | 29.0 ± 22.7 | 33.5 ± 27.3 | 0.99 (0.98–1.01)  | .355 |
| SF-36, Mental health, mean ± SD              | 23.3 ± 15.0 | 30.6 ± 19.0 | 0.97 (0.95–1.00)  | .031 |
| SF-36, Physical component summary, mean ± SD | 37.6 ± 11.0 | 40.5 ± 13.5 | 0.98 (0.95–1.01)  | .239 |
| SF-36, Mental component summary, mean ± SD   | 20.3 ± 8.9  | 23.9 ± 8.9  | 0.95 (0.91–1.00)  | .044 |
| QIDS-J score, mean ± SD                      | 17.7 ± 3.7  | 15.9 ± 5.0  | 1.10 (1.01–1.20)  | .037 |
| CATS, Total score, mean ± SD                 | 1.53 ± 0.76 | 1.29 ± 0.69 | 1.58 (0.93–2.69)  | .093 |
| CATS, Neglect score, mean ± SD               | 1.80 ± 0.90 | 1.43 ± 0.84 | 1.62 (1.04–2.52)  | .035 |
| CATS, Sexual abuse score, mean ± SD          | 0.37 ± 0.67 | 0.12 ± 0.28 | 3.54 (1.13–11.15) | .031 |
| CATS, Punishment score, mean ± SD            | 1.93 ± 0.80 | 1.93 ± 0.89 | 1.00 (0.63–1.57)  | .991 |

**Notes:** \*Subject with missing data was excluded.

**Abbreviations:** BD, bipolar disorder; CATS, Child Abuse and Trauma Scale; CI, confidence interval; GAF, Global Assessment of Functioning; MDD, major depressive disorder; MDE, major depressive episode; n.c., not calculated; QIDS-J, Quick Inventory of Depressive Symptomatology-Self Report, Japanese version; SD, standard deviation; SF-36, 36-item Short-form Health Survey.

**Supplementary Table 2** Univariate logistic regression analyses of demographic and clinical features for patients with MDD and comorbid anxiety disorders versus non-comorbid anxiety disorders

| Features                                                         | Comorbid anxiety group (N=118*) | Non-comorbid anxiety group (N=199*) | Odds ratio (95% CI) | P-value |
|------------------------------------------------------------------|---------------------------------|-------------------------------------|---------------------|---------|
| Sex (male), N (%)                                                | 43 (36.4)                       | 88 (44.4)                           | 0.72 (0.45–1.14)    | .163    |
| History of marriage, N (%)                                       | 65 (55.1)                       | 98 (49.7)                           | 1.24 (0.78–1.96)    | .359    |
| History of divorce, N (%)                                        | 29 (24.8)                       | 32 (16.2)                           | 1.71 (0.97–3.01)    | .063    |
| History of spouse's death, N (%)                                 | 1 (0.9)                         | 7 (3.5)                             | 0.24 (0.03–1.94)    | .179    |
| Presence of spouse, N (%)                                        | 41 (34.7)                       | 67 (33.8)                           | 1.04 (0.64–1.68)    | .869    |
| Presence of child, N (%)                                         | 55 (46.6)                       | 83 (41.9)                           | 1.21 (0.76–1.91)    | .416    |
| Presence of housemate, N (%)                                     | 79 (66.9)                       | 147 (74.6)                          | 0.69 (0.42–1.14)    | .144    |
| Currently employed, N (%)                                        | 50 (42.4)                       | 118 (59.6)                          | 0.50 (0.31–0.79)    | .003    |
| History of job turnover, N (%)                                   | 82 (69.5)                       | 112 (57.4)                          | 1.69 (1.04–2.74)    | .034    |
| History of smoking, N (%)                                        | 49 (41.5)                       | 69 (34.8)                           | 1.33 (0.83–2.12)    | .236    |
| Family history of BD in first-degree relatives, N (%)            | 9 (7.7)                         | 8 (4.0)                             | 1.98 (0.74–5.28)    | .173    |
| Family history of MDD in first-degree relatives, N (%)           | 21 (17.9)                       | 25 (12.7)                           | 1.51 (0.80–2.83)    | .205    |
| Family history of schizophrenia in first-degree relatives, N (%) | 4 (3.4)                         | 4 (2.0)                             | 1.72 (0.42–7.00)    | .451    |
| Family history of suicide in first-degree relatives, N (%)       | 3 (2.5)                         | 5 (2.5)                             | 1.01 (0.24–4.29)    | .993    |
| Family history of alcohol abuse in first-degree relatives, N (%) | 10 (8.5)                        | 4 (2.0)                             | 4.49 (1.38–14.66)   | .013    |
| Early age at onset of MDE (<25 years), N (%)                     | 21 (18.4)                       | 39 (20.3)                           | 0.89 (0.49–1.60)    | .687    |
| Early age at onset of mood episode (<25 years), N (%)            | 21 (18.4)                       | 39 (20.3)                           | 0.89 (0.49–1.60)    | .687    |
| History of psychotic symptoms, N (%)                             | 15 (12.9)                       | 9 (4.6)                             | 3.08 (1.30–7.30)    | .010    |
| Early age at onset of psychotic symptoms (<30 years), N (%)      | 6 (40.0)                        | 4 (44.4)                            | 0.83 (0.16–4.44)    | .831    |
| History of suicide attempt, N (%)                                | 26 (22.2)                       | 22 (11.1)                           | 2.29 (1.23–4.26)    | .009    |
| History of psychiatric hospitalization, N (%)                    | 16 (13.6)                       | 16 (8.1)                            | 1.78 (0.86–3.72)    | .122    |
| Seasonal mood episodes, N (%)                                    | 7 (6.0)                         | 10 (5.1)                            | 1.21 (0.45–3.26)    | .710    |
| Two or more previous mood episodes, N (%)                        | 40 (36.4)                       | 63 (33.0)                           | 1.16 (0.71–1.90)    | .552    |
| Five or more previous mood episodes, N (%)                       | 6 (5.5)                         | 19 (9.9)                            | 0.52 (0.20–1.35)    | .180    |
| Two or more previous mood episodes within the past year, N (%)   | 2 (1.8)                         | 5 (2.6)                             | 0.68 (0.13–3.55)    | .645    |
| Five or more previous mood episodes within the past year, N (%)  | 0 (0.0)                         | 1 (0.5)                             | n.c.                | .987    |

|                                                             |                   |                   |                   |       |
|-------------------------------------------------------------|-------------------|-------------------|-------------------|-------|
| Mood stabilizer therapy in present use, N (%)               | 27 (22.9)         | 35 (17.7)         | 1.38 (0.79–2.43)  | .261  |
| Antidepressant therapy in present use, N (%)                | 101 (85.6)        | 176 (88.9)        | 0.74 (0.38–1.46)  | .390  |
| Antipsychotics therapy in present use, N (%)                | 20 (16.9)         | 29 (14.6)         | 1.19 (0.64–2.21)  | .585  |
| Anxiolytic therapy in present use, N (%)                    | 79 (66.9)         | 121 (61.1)        | 1.29 (0.80–2.08)  | .298  |
| Mood lability with antidepressants, N (%)                   | 4 (3.5)           | 4 (2.0)           | 1.76 (0.43–7.18)  | .430  |
| Antidepressant-related switch to mania/hypomania, N (%)     | 1 (0.9)           | 2 (1.0)           | 0.86 (0.08–9.62)  | .905  |
| Mood reactivity, N (%)                                      | 41 (35.0)         | 77 (38.9)         | 0.85 (0.53–1.36)  | .496  |
| Significant weight gain or increase in appetite, N (%)      | 19 (16.2)         | 16 (8.1)          | 2.21 (1.09–4.48)  | .029  |
| Hypersomnia, N (%)                                          | 22 (18.8)         | 15 (7.6)          | 2.82 (1.40–5.70)  | .004  |
| Lead paralysis, N (%)                                       | 20 (17.1)         | 37 (18.7)         | 0.90 (0.49–1.63)  | .723  |
| Interpersonal rejection sensitivity, N (%)                  | 45 (38.5)         | 52 (26.3)         | 1.75 (1.08–2.86)  | .024  |
| Atypical depression, N (%)                                  | 12 (10.3)         | 17 (8.6)          | 1.22 (0.56–2.65)  | .621  |
| Pathological guilt feelings, N (%)                          | 51 (43.6)         | 28 (14.1)         | 4.69 (2.73–8.06)  | <.001 |
| Duration of MDE period ( $\leq 1$ month), N (%)             | 14 (12.0)         | 20 (10.3)         | 1.19 (0.58–2.46)  | .639  |
| Duration of MDE period (<6 months), N (%)                   | 54 (46.2)         | 81 (41.5)         | 1.21 (0.76–1.91)  | .426  |
| Current psychotic symptoms, N (%)                           | 2 (1.7)           | 3 (1.5)           | 1.12 (0.18–6.81)  | .901  |
| History of parent's bereavement, N (%)                      | 27 (25.2)         | 50 (26.0)         | 0.96 (0.56–1.65)  | .879  |
| History of nurture except parents, N (%)                    | 8 (7.5)           | 10 (5.2)          | 1.48 (0.57–3.87)  | .425  |
| Comorbid substance-related disorder, N (%)                  | 11 (9.5)          | 3 (1.5)           | 6.73 (1.84–24.67) | .004  |
| Comorbid personality disorder, N (%)                        | 0 (0.0)           | 0 (0.0)           | –                 | –     |
| Mixed features of MDE, N (%)                                | 5 (4.2)           | 5 (2.5)           | 1.72 (0.49–6.06)  | .401  |
| Age (years), mean $\pm$ SD                                  | 40.0 $\pm$ 9.1    | 39.9 $\pm$ 11.0   | 1.00 (0.98–1.02)  | .918  |
| Duration of education (years), mean $\pm$ SD                | 12.9 $\pm$ 2.5    | 13.8 $\pm$ 2.2    | 0.86 (0.77–0.94)  | .002  |
| Amount of alcohol intake (g/week), mean $\pm$ SD            | 192.1 $\pm$ 320.4 | 113.3 $\pm$ 165.2 | 1.00 (1.00–1.00)  | .091  |
| Age at onset of (hypo) manic episode (years), mean $\pm$ SD | –                 | –                 | –                 | –     |
| Age at onset of MDE (years), mean $\pm$ SD                  | 34.0 $\pm$ 10.0   | 34.2 $\pm$ 10.4   | 1.00 (0.98–1.02)  | .868  |
| Age at onset of mood episode (years), mean $\pm$ SD         | 34.0 $\pm$ 10.0   | 34.2 $\pm$ 10.4   | 1.00 (0.98–1.02)  | .868  |
| Age at onset of psychotic symptoms (years), mean $\pm$ SD   | 36.1 $\pm$ 10.0   | 29.6 $\pm$ 7.4    | 1.09 (0.98–1.22)  | .109  |
| Previous mood episodes, mean $\pm$ SD                       | 1.6 $\pm$ 2.8     | 1.7 $\pm$ 3.5     | 0.99 (0.92–1.07)  | .834  |
| Previous mood episodes within the past year, mean $\pm$ SD  | 0.3 $\pm$ 0.5     | 0.2 $\pm$ 0.6     | 1.29 (0.84–1.99)  | .242  |
| Duration of MDE period (month), mean $\pm$ SD               | 20.2 $\pm$ 33.0   | 17.2 $\pm$ 28.0   | 1.00 (1.00–1.01)  | .390  |
| GAF score, mean $\pm$ SD                                    | 56.8 $\pm$ 9.4    | 53.8 $\pm$ 10.3   | 1.03 (1.01–1.06)  | .013  |
| SF-36, Physical functioning, mean $\pm$ SD                  | 72.3 $\pm$ 22.4   | 80.7 $\pm$ 15.7   | 0.98 (0.96–0.99)  | <.001 |
| SF-36, Role physical, mean $\pm$ SD                         | 45.1 $\pm$ 27.6   | 55.4 $\pm$ 29.1   | 0.99 (0.98–1.00)  | .003  |

|                                              |             |             |                  |       |
|----------------------------------------------|-------------|-------------|------------------|-------|
| SF-36, Bodily pain, mean ± SD                | 53.0 ± 27.3 | 63.5 ± 27.4 | 0.99 (0.98–0.99) | .001  |
| SF-36, General health perception, mean ± SD  | 32.7 ± 15.4 | 38.9 ± 16.4 | 0.98 (0.96–0.99) | .001  |
| SF-36, Vitality, mean ± SD                   | 18.7 ± 16.1 | 28.2 ± 19.1 | 0.97 (0.96–0.98) | <.001 |
| SF-36, Social functioning, mean ± SD         | 48.6 ± 28.2 | 49.9 ± 26.3 | 1.00 (0.99–1.01) | .691  |
| SF-36, Role emotional, mean ± SD             | 34.5 ± 25.4 | 44.7 ± 26.2 | 0.98 (0.98–0.99) | .001  |
| SF-36, Mental health, mean ± SD              | 28.5 ± 17.5 | 36.9 ± 19.9 | 0.98 (0.96–0.99) | <.001 |
| SF-36, Physical component summary, mean ± SD | 39.4 ± 12.4 | 44.4 ± 10.2 | 0.96 (0.94–0.98) | <.001 |
| SF-36, Mental component summary, mean ± SD   | 23.5 ± 10.9 | 26.7 ± 11.3 | 0.97 (0.95–0.99) | .015  |
| QIDS-J score, mean ± SD                      | 15.9 ± 4.4  | 13.1 ± 5.0  | 1.13 (1.07–1.19) | <.001 |
| CATS, Total score, mean ± SD                 | 1.34 ± 0.69 | 1.04 ± 0.69 | 1.83 (1.32–2.56) | <.001 |
| CATS, Neglect score, mean ± SD               | 1.55 ± 0.92 | 1.15 ± 0.92 | 1.58 (1.23–2.03) | <.001 |
| CATS, Sexual abuse score, mean ± SD          | 0.20 ± 0.59 | 0.12 ± 0.28 | 1.55 (0.89–2.69) | .120  |
| CATS, Punishment score, mean ± SD            | 1.94 ± 0.79 | 1.59 ± 0.77 | 1.81 (1.33–2.46) | <.001 |

**Notes:** \*Subject with missing data was excluded.

**Abbreviations:** BD, bipolar disorder; CATS, Child Abuse and Trauma Scale; CI, confidence interval; GAF, Global Assessment of Functioning; MDD, major depressive disorder; MDE, major depressive episode; n.c., not calculated; QIDS-J, Quick Inventory of Depressive Symptomatology-Self Report, Japanese version; SD, standard deviation; SF-36, 36-item Short-Form Health Survey.

## **Supplementary text**

List of participating institutions (alphabetical order).

Aozora Clinic, Aratama-Kokoro Clinic, Fukushima Clinic, Hannan Hospital, Hitsuji Clinic, Hokkaido University Hospital, Inada Clinic, J Clinic, JCHO Tokyo Shinjuku Medical Center, Kawamura-Mental Clinic, Kindai University Hospital, Kouseiren Takaoka Hospital, Maruyama-park Mental Clinic, MikuniHill Hospital, Nishio Clinic, Nonami-Shinryo Clinic, Sapporo City General Hospital, Sapporo Kobushi Clinic, Seishinkai Fujita Mental Care Satellite, Seishinkai Okehazama Hospital Fujita Kokoro Care Center, Shinagawa-Shinryo Naika, Urban Life Clinic, Yashima Mental Clinic.
